# Supplementary material
Source: Springer Nature journal article supplement (https://www.springermedizin.de/resource/supplementary/12933_2010_257_MOESM1_ESM.pdf/9539956)
Supplement: MOESM1 [file 9539956]

Study  
population

Subjects with candesartan cilexetil  
monotherapy without other antihypertensive  
agents or antihyperlipidemic agents,  
483 patients

Longitudinal survey  
data for 12 months

TG data  
1114 examinations,  
405 patients

TC data  
1204 examinations,  
440 patients

HDL-C data  
708 examinations,  
313 patients

LDL-C data  
781 examinations,  
304 patients
